# Supplementary material
Source: MDPI journal article supplement (https://www.mdpi.com/2072-4292/13/23/4855)
Supplement: s1 [file s1]

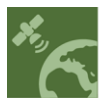

# Change in Distribution Pattern of PM<sub>2.5</sub> Pollution over Central China

Lijuan Shen <sup>1</sup>, Weiyang Hu <sup>1</sup>, Tianliang Zhao <sup>1,\*</sup>, Yongqing Bai <sup>2</sup>, Honglei Wang <sup>1</sup>, Shaofei Kong <sup>3</sup>, Yan Zhu <sup>1</sup>

<sup>1</sup> Collaborative Innovation Center on Forecast and Evaluation of Meteorological Disasters, Key Laboratory for Aerosol-Cloud-Precipitation of the China Meteorological Administration, PREMIC, Nanjing University of Information Science & Technology, Nanjing 210044, China; 20181103046@nuist.edu.cn (L.S.), dg21250013@smail.nju.edu.cn (W.H.), hongleiwang@nuist.edu.cn (H.W.), 20191203041@nuist.edu.cn (Y.Z.)

<sup>2</sup> Institute of Heavy Rain, China Meteorological Administration, Wuhan 430205, China; baiyq@whhr.com.cn

<sup>3</sup> Department of Atmospheric Sciences, School of Environmental Studies, China University of Geosciences (Wuhan), Wuhan 430074, China; kongshaofei@cug.edu.cn

\* Correspondence: tlzhao@nuist.edu.cn

**Table S1.** Descriptive statistics of HPEs over THB during 2015–2019.

| Dates<br>(YYYYMMDD) | Number<br>of Cities<br>Affected | Average<br>Concentrations<br>( $\mu\text{g m}^{-3}$ ) | Maximum<br>Concentrations<br>( $\mu\text{g m}^{-3}$ ) | Regional<br>Contribution<br>(%) |
|---------------------|---------------------------------|-------------------------------------------------------|-------------------------------------------------------|---------------------------------|
| 20151211            | 9                               | 156                                                   | 277                                                   | 66.9                            |
| 20151212            | 11                              | 179                                                   | 264                                                   | 70.9                            |
| 20151223            | 5                               | 133                                                   | 190                                                   | 70.6                            |
| 20151224            | 3                               | 115                                                   | 178                                                   | 70.3                            |
| 20151225            | 9                               | 164                                                   | 281                                                   | 51.4                            |
| 20151230            | 4                               | 128                                                   | 169                                                   | 28.7                            |
| 20160102            | 4                               | 131                                                   | 206                                                   | 19.4                            |
| 20160104            | 8                               | 163                                                   | 342                                                   | 75.0                            |
| 20160105            | 4                               | 129                                                   | 229                                                   | 80.3                            |
| 20160111            | 6                               | 133                                                   | 215                                                   | 63.2                            |
| 20160118            | 8                               | 154                                                   | 235                                                   | 73.7                            |
| 20160130            | 3                               | 99                                                    | 208                                                   | 78.9                            |
| 20160208            | 12                              | 196                                                   | 312                                                   | 30.8                            |
| 20160306            | 3                               | 99                                                    | 183                                                   | 51.5                            |
| 20161115            | 4                               | 114                                                   | 261                                                   | 75.0                            |
| 20161209            | 3                               | 122                                                   | 176                                                   | 40.7                            |
| 20161220            | 4                               | 125                                                   | 417                                                   | 60.9                            |
| 20170102            | 7                               | 138                                                   | 185                                                   | 36.8                            |
| 20170103            | 8                               | 154                                                   | 213                                                   | 44.7                            |
| 20170104            | 13                              | 179                                                   | 229                                                   | 1.7                             |
| 20170128            | 14                              | 221                                                   | 449                                                   | 30.8                            |
| 20170217            | 4                               | 130                                                   | 165                                                   | 62.2                            |
| 20170306            | 6                               | 139                                                   | 216                                                   | 61.5                            |
| 20170307            | 6                               | 137                                                   | 203                                                   | 53.4                            |
| 20171204            | 4                               | 124                                                   | 278                                                   | 69.7                            |
| 20171205            | 6                               | 141                                                   | 185                                                   | 56.4                            |
| 20171229            | 3                               | 119                                                   | 279                                                   | 30.1                            |
| 20171230            | 3                               | 118                                                   | 170                                                   | 47.5                            |
| 20180102            | 3                               | 104                                                   | 207                                                   | 46.9                            |
| 20180119            | 10                              | 171                                                   | 307                                                   | 36.6                            |
| 20180120            | 5                               | 126                                                   | 228                                                   | 17.1                            |
| 20180216            | 5                               | 133                                                   | 190                                                   | 49.9                            |
| 20181130            | 7                               | 150                                                   | 237                                                   | 50.0                            |
| 20181201            | 10                              | 176                                                   | 269                                                   | 37.0                            |
| 20181202            | 5                               | 129                                                   | 203                                                   | 22.5                            |
| 20190105            | 7                               | 154                                                   | 279                                                   | 76.8                            |
| 20190106            | 12                              | 175                                                   | 324                                                   | 45.6                            |
| 20190107            | 8                               | 159                                                   | 287                                                   | 36.6                            |
| 20190108            | 8                               | 152                                                   | 270                                                   | 77.6                            |

---

|          |    |     |     |      |
|----------|----|-----|-----|------|
| 20190126 | 5  | 125 | 190 | 84.9 |
| 20190128 | 3  | 119 | 154 | 50.0 |
| 20190129 | 3  | 120 | 186 | 59.8 |
| 20190130 | 4  | 113 | 194 | 28.9 |
| 20190205 | 10 | 158 | 252 | 13.9 |
| 20191214 | 4  | 132 | 187 | 38.3 |
| 20191215 | 4  | 122 | 211 | 52.4 |

---

Note: the dates with red font refer to the co-existing HPEs in NCP and THB.
